# Supplementary material
Source: publisher figshare collection journal article supplement (https://gsajournals.figshare.com/ndownloader/files/21211548)
Supplement: Supplementary file 1 [file 21211548]

## Sheet: Sheet1
Gene number	Gene symbol	AALF VectorBase ID	Gene description (or link to locus if unannotated)	male_testes	male_carcass	NBF_carcass	PBM_carcass_12hr	PBM_carcass_24hr	PBM_carcass_36hr	PBM_carcass_48hr	PBM_carcass_60hr	PBM_carcass_72hr	NBF_Ovaries	PBM_Ovaries_12hr	PBM_Ovaries_24hr	PBM_Ovaries_36hr	PBM_Ovaries_48hr	PBM_Ovaries_60hr	PBM_Ovaries_72hr	diapause_0_1_wk	diapause_1_2_wk	diapause_2_3_wk	diapause_3_4_wk	Embryo_0_1	Embryo_0_4	Embryo_4_8	Embryo_8_12	Embryo_12_16	Embryo_16_20	Embryo_20_24	Embryo_24_28	Embryo_28_32	Embryo_32_36	Embryo_36_40	Embryo_40_44	Embryo_44_48	Embryo_48_52	Embryo_52_56	Embryo_56_60	Embryo_60_64	Embryo_64_68	Embryo_68_72	1st_instar_larvae	2nd_instar_larvae	3rd_instar_larvae	4th_instar_larvae	pupae_male_early	pupae_female_early	pupae_male_late
miRNA/siRNA pathway proteins
gene2514	LOC109425656	AALF020776	protein argonaute-2%2C transcript variant X1	10.8041	4.78472	6.26163	2.81523	2.31718	3.01796	6.57638	2.26098	3.2285	31.8354	23.4159	27.8722	17.5425	18.527	31.7952	28.6491	19.5883	5.05075	7.4334	5.56373	26.6915	34.9918	39.7468	21.4927	11.902	11.3856	18.0583	16.3421	18.7517	13.437	12.742	14.2729	13.3742	11.2125	12.4929	10.0555	9.99596	14.7044	8.8479	1.00921	3.21745	1.7374	3.978	10.8072	3.03424	3.55001
gene31276	LOC109399310	AALF013537	microprocessor complex subunit DGCR8%2C transcript variant X2	5.55801	2.08842	2.19953	1.66936	0.880087	1.90813	3.05868	2.11842	3.65254	14.4089	12.0178	11.856	9.36447	11.0918	14.1079	14.0786	3.37269	4.82445	2.89778	6.33224	11.6963	12.0953	10.9781	7.55932	6.1266	6.29783	6.94174	7.05868	6.22705	5.90464	5.49104	5.26114	4.19066	6.68863	4.61808	3.72011	3.06463	5.29127	3.4961	2.24427	2.54136	1.96803	1.32132	3.31261	3.73761	1.13291
gene1782	LOC109417569	AALF019674	ribonuclease 3-like	7.58102	2.08919	1.87319	1.36129	0.867209	2.12853	3.30204	2.04937	2.23243	15.5783	9.34513	8.49409	5.01953	6.74071	9.42977	8.74716	9.23261	5.11218	4.54572	5.27687	10.2823	10.8132	10.5198	7.49753	4.3361	4.60423	5.40894	5.63285	6.24559	4.98792	6.50828	5.81364	4.94431	3.86832	4.35181	4.04642	4.0602	5.43503	4.20148	1.26155	1.68555	1.47637	1.71093	3.41883	2.64004	1.35163
gene23420	LOC109427687	AALF007043	endoribonuclease Dcr-1	7.94669	0.623389	0.984829	0.514752	0.344124	0.598806	1.07923	0.709268	0.670938	7.11634	4.8886	7.49148	4.53541	5.47519	8.98192	7.38089	1.68527	0.930621	1.18845	0.466402	7.37794	5.04023	4.5142	3.53554	1.99724	1.61214	2.53892	2.48639	2.9761	2.29745	3.22164	3.32405	2.54187	1.36226	2.43376	1.94206	1.64796	2.97731	1.56125	0.439872	0.924822	0.301398	0.702255	1.3163	0.734621	0.476979
gene4061	LOC109403945	AALF027719	endoribonuclease Dicer	73.6376	18.4745	12.6892	10.49	6.32792	14.1111	17.574	10.6314	13.3195	39.8444	34.4294	39.2243	19.0561	18.6955	28.8227	25.42	14.5909	1.58647	8.72223	1.40666	22.8161	17.3565	15.3368	30.3258	36.6874	37.0518	30.0067	32.1716	24.7122	11.3748	12.6918	10.7889	5.87328	15.7439	8.13388	5.50593	3.60235	8.49551	4.18182	2.06577	5.01777	6.76744	7.23177	13.8383	8.79327	11.0041
gene4310	LOC109406841	AALF018531	interferon-inducible double-stranded RNA-dependent protein kinase activator A homolog%2C transcript variant X3	17.7464	10.5993	16.2815	9.20706	3.44401	10.9304	19.3886	11.0153	20.2148	42.7424	55.5086	26.6873	33.352	44.5426	47.9983	54.5911	31.0306	7.56121	22.697	8.0372	68.4461	92.4403	121.23	108.689	86.1052	67.6368	74.2411	82.5819	79.2652	118.218	93.26	81.8631	62.2315	135.67	73.1474	56.816	50.358	85.1601	51.3871	27.7274	43.587	20.2784	21.5803	41.866	38.2385	12.2347
gene35139	LOC109403367	AALF023568	putative helicase MOV-10	9.11384	0.692323	2.04033	0.529277	0.472704	5.4704	6.65083	3.2389	5.3583	22.7558	10.3402	11.0699	11.9911	16.5632	19.1008	17.3431	0.915413	0.364193	1.16257	0.164512	20.6063	25.0529	20.572	4.32947	3.52361	3.34129	2.26688	2.26042	2.61892	1.66686	0.858993	1.32783	0.825771	2.92722	1.03804	0.861698	0.997738	1.32809	0.873766	0.384321	0.320097	0.264423	0.405707	0.433086	0.352233	0.349138
gene7448	LOC109410612	AALF006625	exportin-5	21.9564	2.30452	4.86642	2.70239	0.941613	2.59056	3.92779	2.45875	2.95586	33.0801	21.6883	28.7851	15.239	12.9002	26.0529	24.0508	3.67142	3.61543	6.8222	3.73392	21.2103	6.11739	6.35143	12.612	9.75933	9.95187	11.066	9.91732	8.36238	7.85824	6.39284	7.5707	5.32013	6.73944	3.87764	4.00287	3.81366	6.03762	4.27399	2.35414	5.18949	2.07752	2.86442	5.20546	3.30683	2.31392
gene1083	LOC109409292	AALF018447	GTP-binding nuclear protein Ran%2C transcript variant X1	135.582	24.6902	84.533	54.2938	13.383	63.3549	54.3079	78.0865	72.9565	318.168	338.476	217.538	156.617	137.217	150.598	184.466	71.1735	97.8013	145.537	81.1378	158.525	147.143	175.356	393.307	522.311	460.122	496.087	522.767	455.476	348.827	213.731	156.356	105.227	614.552	108.744	94.6742	84.601	161.417	83.5991	166.49	223.163	80.3761	110.931	75.9425	86.8174	30.5405
gene5080	LOC109407983	--	uncharacterized LOC109407983	8.8824	0.90591	1.16613	0.837987	0.374789	1.48	1.42293	1.75033	1.02918	7.21753	7.61621	5.76708	4.9267	6.04404	6.35586	6.97551	1.58062	1.09243	1.76602	1.90253	6.95765	1.45829	1.99126	9.50408	4.61385	4.21643	4.01687	4.34807	4.31645	3.1338	3.11555	2.60945	2.11725	3.66193	2.39208	1.71444	2.00926	2.92288	1.46399	0.744971	1.57645	0.966237	1.26628	1.72545	1.8863	0.730502
gene24983	LOC109429432	AALF016805	protein Gawky%2C transcript variant X1	10.1263	1.85704	1.95285	0.966359	0.906683	0.904455	3.69368	1.28508	1.27262	22.8652	17.975	22.7371	13.5323	17.5776	29.5923	26.4292	11.4787	2.22489	1.80449	2.30169	25.6147	33.3037	28.266	5.61438	2.74747	3.15104	3.88368	3.77702	4.57761	1.8686	1.64344	2.29387	1.96649	2.08422	1.8218	2.14391	1.9932	2.23675	1.41157	0.70152	0.653575	0.219652	0.699194	1.73037	0.283854	1.4294
gene21070	LOC109425152	AALF016807	protein Gawky%2C transcript variant X2	15.4948	12.4551	10.4616	5.28925	4.74652	7.22169	10.0759	5.3553	9.69659	27.6504	22.4665	40.1368	23.8155	7.57242	13.8238	14.2503	8.49661	2.3396	5.02792	2.20703	13.3483	3.48134	3.80853	14.9486	14.1894	13.0825	13.9017	12.5509	12.3876	13.3648	7.16835	12.3136	7.95392	10.4149	9.46178	8.94297	7.42899	10.5838	8.23794	2.39515	5.12428	3.17125	5.33732	15.3891	9.4276	9.42356
gene7118	LOC109410219	AALF024292	CCR4-NOT transcription complex subunit 1-like%2C transcript variant X1	17.4071	13.256	13.8402	9.29644	5.4099	9.27217	10.5156	7.20381	10.5809	21.5053	14.5061	24.0709	12.3922	7.60327	18.159	15.4849	24.3854	8.02195	17.3302	6.88164	9.78058	3.14606	2.53098	18.5884	23.12	27.2241	34.7794	30.4031	24.7284	20.4548	24.0451	23.3672	19.9068	17.1023	12.0019	12.0898	12.5689	19.7121	13.3606	5.02334	9.54295	6.46069	9.2875	19.0947	13.4112	10.3589
gene2686	LOC109427477	AALF020548	CCR4-NOT transcription complex subunit 3%2C transcript variant X1	47.4684	15.458	17.4495	9.84615	7.54007	12.5237	20.6422	10.7467	14.3045	64.9731	50.5964	66.1381	45.2977	50.5634	73.8311	69.1734	19.6342	10.9731	16.1938	9.83349	75.9127	94.1154	99.338	43.7187	37.4147	43.2655	46.6272	42.7265	45.2955	32.097	37.0476	42.5065	32.4246	26.7796	27.0569	25.8506	26.864	41.1117	26.8213	11.8475	15.9623	8.48739	12.6959	31.3233	22.8923	14.4037
gene31896	LOC109427843	AALF023639	gametocyte-specific factor 1 homolog (gstf)	19.4027	13.4423	14.5969	11.9848	6.4524	14.1846	21.742	14.5442	19.1595	42.5355	29.723	31.3811	18.2734	24.5517	35.33	33.326	123.018	206.928	121.427	238.133	25.0829	19.976	17.8058	13.7152	18.8959	21.4717	24.421	23.3857	21.6236	20.1949	22.3966	25.8109	20.7296	16.6964	21.8658	16.5302	15.4251	22.3334	14.0641	12.6793	9.98934	19.1442	10.5738	21.6278	17.2069	12.9385
gene6974	LOC109410076	AALF001109	CCR4-NOT transcription complex subunit 11	6.6754	2.88693	3.9261	4.08349	1.8858	5.69838	4.66632	6.74348	5.33189	6.6172	7.61015	5.1938	5.81238	2.60024	2.00851	2.38769	4.51392	1.46233	4.92722	1.1357	0.94993	1.00928	3.82616	14.2166	18.4362	15.1249	12.6241	14.4809	13.0147	18.2388	14.4093	9.33209	8.47002	23.813	10.1879	7.81752	6.98605	10.6349	6.98267	4.38088	5.63716	4.0979	4.24359	5.62376	7.33095	2.20055
gene28598	LOC109433074	AALF025916	protein argonaute-3-like%2C transcript variant X2	39.6499	6.40391	9.62404	6.61623	3.16979	11.5166	13.6336	10.7944	9.25568	85.0251	61.077	63.0215	47.3019	54.331	70.8753	74.569	30.242	11.0101	18.9524	13.9521	56.7838	49.5562	53.2287	39.4905	35.7301	37.7301	32.7002	34.4015	32.9652	20.9605	23.2628	19.9683	15.3415	27.1177	14.198	13.171	11.3624	18.8167	11.4181	5.40626	6.87375	8.43556	7.17422	11.2021	8.77706	3.01079
gene10195	LOC109413546	AALF020776	protein argonaute-2-like%2C transcript variant X2	8.55344	3.93951	6.26595	2.17036	2.07683	2.56684	5.97448	1.99039	2.95662	25.348	20.1603	21.5836	14.9105	15.7317	25.6197	24.1311	16.2213	4.54694	6.81996	4.54328	22.7698	28.2705	33.0842	18.4104	10.0816	9.23416	14.4863	13.7017	15.4766	11.6649	10.5794	12.175	11.2145	9.42894	10.4493	8.62205	8.67571	12.7903	7.61348	0.967536	2.83732	1.49721	3.51729	9.24608	2.88968	3.13301
gene26924	LOC109431485	AALF018294	endoribonuclease Dcr-1-like%2C transcript variant X1 (twin)	8.58268	0.55002	0.957269	0.579878	0.308271	0.617994	1.32794	0.469312	0.737939	7.1908	5.63334	7.74735	4.42671	5.63487	9.28141	7.82183	1.54599	0.842751	1.14006	0.442365	7.91788	5.29797	4.58476	3.75655	1.93162	1.71193	2.53089	2.70138	3.0274	2.48336	3.31819	3.37535	2.6863	1.43224	2.89661	1.87897	1.9235	3.11946	1.57812	0.446583	0.968645	0.422831	0.678048	1.23263	0.69732	0.617644
gene20258	LOC109414932	AALF023568	putative helicase MOV-10	13.6963	0	0	0	0	0.00569961	0.467858	0.238872	0.0253452	25.166	17.1584	12.1249	10.2067	8.64338	11.5658	12.095	0.175818	0.172439	0.259241	0.0667655	9.67764	2.47225	1.60734	0.883367	0.467751	0.488921	0.433141	0.404685	0.455834	0.449051	0.348336	0.165556	0.21386	0.527213	0.177506	0.169263	0.155844	0.332711	0.190384	0.110284	0.0849073	0.13911	0.117807	0.564704	0.0505381	0.441932
piRNA pathway proteins
gene28598	LOC109433074	AALF025916	protein argonaute-3-like%2C transcript variant X2	39.6499	6.40391	9.62404	6.61623	3.16979	11.5166	13.6336	10.7944	9.25568	85.0251	61.077	63.0215	47.3019	54.331	70.8753	74.569	30.242	11.0101	18.9524	13.9521	56.7838	49.5562	53.2287	39.4905	35.7301	37.7301	32.7002	34.4015	32.9652	20.9605	23.2628	19.9683	15.3415	27.1177	14.198	13.171	11.3624	18.8167	11.4181	5.40626	6.87375	8.43556	7.17422	11.2021	8.77706	3.01079
gene8093	LOC109411297	AALF025919	protein argonaute-3%2C transcript variant X1	28.3316	4.29026	6.49069	4.52788	2.1208	8.32358	9.68988	7.42019	6.74029	61.4047	42.7555	44.0305	32.5642	39.2542	50.8843	52.8067	19.9425	7.24226	13.4788	9.27015	40.8497	34.6066	37.2865	26.9445	25.1514	27.3455	24.3783	23.769	24.1255	14.6224	16.8623	13.9587	10.7035	18.832	9.64776	9.58167	8.45167	14.4275	8.26661	3.37672	4.77434	5.37595	5.29089	7.62884	5.8335	2.191
gene36308	LOC109404625	AALF008582	protein aubergine	5.19646	2.76494	11.9636	8.90604	2.4151	9.76265	17.048	12.0798	16.7137	25.0075	32.5713	29.7243	45.6189	63.9902	84.7784	80.376	55.7034	44.0261	43.0293	35.4259	121.438	169.247	226.358	175.779	127.91	135.864	136.301	130.305	104.047	64.8349	70.3781	56.0666	35.0844	86.969	31.2843	22.6752	17.1184	53.8404	15.64	17.1652	27.5597	16.1853	16.677	15.2693	15.1602	1.88148
gene33671	LOC109401826	AALF008582	protein aubergine-like	89.9726	0.00843405	0.0759968	0.0454109	0	0.0651588	2.54889	0.950429	0.091341	179.249	82.4147	34.2538	27.4027	26.7378	45.712	48.1217	1.26242	1.54135	2.17212	1.04852	5.84667	2.31807	0.787888	0.371391	0.47358	0.400353	0.737872	0.833211	0.562652	1.37914	1.10035	1.48617	1.28122	0.910782	1.08683	1.19238	1.46617	1.38148	2.28139	2.10699	1.04331	1.24768	0.865455	2.2987	1.53168	1.92484
gene33672	LOC109401827	AALF005499	protein aubergine	65.4928	0.0171868	0.0281573	0.0190519	0.0104176	0.0336317	2.63152	1.77202	0.0283246	121.006	81.5791	83.3039	56.1782	26.2275	42.0925	41.1782	0.451505	0.479808	0.927784	0.345783	24.7992	7.5677	3.00795	1.12719	0.886885	0.851982	0.894067	0.810672	0.808399	1.55515	1.41704	1.68169	1.35773	1.49112	0.985565	1.19841	1.31655	1.38919	1.6242	0.637624	0.782832	0.94763	0.937035	1.95525	1.29561	1.15423
gene9789	LOC109413120	AALF005498	protein aubergine	7.5055	5.76048	12.7358	11.6628	4.76472	11.6542	12.6382	8.19607	12.4693	40.0079	40.811	26.3838	5.51289	4.12514	7.58436	5.3168	17.0551	7.99107	16.8062	6.8394	0.269565	0.267048	64.553	229.125	111.563	113.933	116.028	108.719	105.059	45.9984	44.3117	40.0791	28.9109	71.6346	27.2246	21.5621	18.9793	39.6556	19.4069	7.43811	17.1405	12.5443	20.1382	18.6408	14.9567	4.28613
gene18867	LOC109422824	AALF007445	protein aubergine-like	0.154883	0	0	0.0114884	0.00549667	0.00576141	0.0181896	0.00862365	0	0.199429	0.103097	0.0802597	0.149932	0.0281994	0.0632581	0.0965643	0.0205543	0	0.327566	0.0149976	0.124244	16.5271	114.267	0.82061	0.232774	0.278435	0.176136	0.0323423	0.170133	0.0139668	0.089155	0.0906488	0.0317911	0.0789525	0.0176772	0.119025	0.0113698	0	0.0251019	0	0	0.0167403	0	0.0416228	0	0.0115869
gene14853	LOC109418558	AALF016369	protein aubergine%2C transcript variant X2	11.9724	7.9588	12.7337	6.90551	4.6759	11.8478	17.0977	11.7405	11.5096	81.752	77.0544	68.1089	41.4064	41.2003	46.7685	42.6091	44.3008	4.47041	30.3662	4.70647	37.8855	42.3168	122.16	272.957	185.146	198.15	177.263	158.116	139.057	80.735	77.9283	66.6496	52.7977	133.215	38.1966	30.7676	30.5763	62.4676	29.3743	7.97724	13.2343	12.2554	17.64	24.4791	21.1775	5.42475
gene31448	LOC109399472	AALF004386	probable RNA helicase armi%2C transcript variant X1	44.2055	15.2604	22.4565	13.0463	7.9087	15.8001	19.4884	14.5225	17.4304	57.3135	45.1302	44.642	25.2088	31.9047	40.7526	38.9164	6.02339	6.66479	9.96599	5.72822	34.4053	39.4848	51.1534	65.6022	31.779	32.8952	31.5998	29.2377	34.7058	17.2458	22.6267	26.4735	19.4621	14.7573	21.4161	18.5812	19.6521	23.4899	20.0499	14.1132	24.9062	13.6992	17.2064	18.3043	16.4701	15.0897
gene23593	LOC109427843	AALF023639	gametocyte-specific factor 1 homolog (gstf)	132.454	0	0	0	0	0.0534801	7.99198	4.2159	0.13212	120.346	143.492	92.2261	79.2203	101.679	94.3481	113.223	2.41481	2.18303	3.96406	2.01862	120.003	53.8799	14.8424	6.30103	5.44682	5.4922	3.1546	3.24345	3.61912	4.12707	2.94163	2.56748	2.2821	7.14552	2.46749	2.92324	3.30607	3.14188	2.97732	2.21745	0.885217	0.953068	0.54186	2.0054	0.587111	3.39079
gene12886	LOC109416367	AALF013981	probable ATP-dependent RNA helicase DDX43%2C transcript variant X1	56.9069	3.66415	6.81017	6.10252	2.42134	7.72993	9.03889	9.50663	8.07815	74.2352	51.0844	54.4385	46.9978	28.6116	45.787	43.0707	4.27757	14.7068	11.9445	11.8184	50.2136	21.8556	22.5978	17.5188	23.2719	27.053	14.4008	13.9429	11.474	11.4337	6.10045	8.65778	4.32898	12.7827	4.01611	2.94315	2.31751	7.92454	3.56667	8.55161	7.67345	6.42388	6.45522	9.75522	12.1419	3.28857
gene12459	LOC109415901	AALF003796	uncharacterized LOC109415901	11.8007	2.15815	3.76496	2.00702	1.06089	2.66696	7.90941	5.56159	3.64942	45.1976	37.9673	42.4696	35.4958	47.6145	61.6465	61.8921	5.30272	3.7207	6.11471	4.14192	93.3552	66.0539	52.7894	18.5075	16.1893	16.253	15.7789	16.1845	16.1736	8.24043	9.48492	9.14361	6.09596	9.38457	6.14205	5.56415	5.80728	8.33891	5.12929	4.29826	4.71745	2.09445	2.90551	3.45535	3.34008	1.56625
gene7105	LOC109410215	AALF002711	protein arginine N-methyltransferase 5-like	30.4529	0.784548	3.0057	1.48324	0.453598	3.12874	3.27649	3.23683	2.53479	30.7443	21.9232	18.0025	18.6297	31.5594	33.7247	34.9881	1.55302	5.33612	4.69902	2.71483	34.597	47.4635	38.8074	19.82	15.375	16.9827	13.3286	12.5826	10.7657	8.70005	7.41427	6.43179	5.35696	15.7367	4.62609	4.24771	4.18444	6.43916	4.12066	4.76937	7.86335	2.08554	2.881	3.07867	2.51585	0.966212
gene24963	LOC109429413	AALF015398	histone-lysine N-methyltransferase eggless	19.9109	2.20129	3.16423	2.8689	1.31895	2.5667	5.20211	3.6373	2.95865	42.0813	24.1942	32.7092	23.4468	25.2173	33.7545	29.2557	11.2616	2.71353	6.44176	1.79589	19.6209	30.2868	34.3389	31.7887	17.9149	22.0278	31.2963	31.183	31.5676	16.7732	22.6489	23.7945	13.3438	13.6581	13.6131	7.96349	6.5093	20.6516	6.2529	3.59558	5.05113	2.89075	5.64852	9.13412	6.43802	2.05792
gene18426	LOC109422364	AALF017640	ankyrin repeat%2C SAM and basic leucine zipper domain-containing protein 1-like	8.71629	1.10292	2.16585	2.13419	0.641054	3.93559	3.23258	3.1609	2.57533	10.6358	13.2059	9.54439	11.5449	12.0902	12.4077	14.4617	2.79368	2.70581	3.12898	3.70637	12.1549	9.78555	11.0461	8.69793	6.63732	5.072	4.0121	5.04773	5.01173	5.48004	4.47027	3.73691	3.09325	7.46498	3.85308	3.11092	2.33182	3.51287	2.34202	2.77276	2.87185	2.01929	2.12409	1.81293	2.44398	0.91872
gene5080	LOC109407983	--	uncharacterized LOC109407983	8.8824	0.90591	1.16613	0.837987	0.374789	1.48	1.42293	1.75033	1.02918	7.21753	7.61621	5.76708	4.9267	6.04404	6.35586	6.97551	1.58062	1.09243	1.76602	1.90253	6.95765	1.45829	1.99126	9.50408	4.61385	4.21643	4.01687	4.34807	4.31645	3.1338	3.11555	2.60945	2.11725	3.66193	2.39208	1.71444	2.00926	2.92288	1.46399	0.744971	1.57645	0.966237	1.26628	1.72545	1.8863	0.730502
gene92	LOC109411870	AALF025714	heat shock protein 83	181.58	33.2736	82.4002	86.5758	7.30782	47.4907	100.026	72.058	121.095	209.752	232.953	305.511	314.861	337.934	342.784	298.269	77.27	67.7749	81.6912	58.8748	415.997	405.818	345.662	67.1693	77.9266	140.171	172.858	160.985	62.4656	80.7947	167.725	101.225	78.3171	112.016	79.124	79.0321	70.2926	97.5996	83.6009	204.788	129.888	34.1263	30.5223	145.304	109.8	134.074
gene19459	LOC109423491	AALF019657	uncharacterized LOC109423491	12.6835	0.53416	0.426888	0.0495157	0.0631758	0.115883	1.2805	0.768146	0.319001	18.3117	19.9318	17.3186	15.6084	18.015	17.3254	19.0372	0.52177	0.286201	0.993506	0.323203	18.3103	18.2103	14.1224	3.26719	2.61268	2.34013	2.05784	1.78149	1.91468	1.68553	1.32539	1.38248	0.977416	2.67505	1.3653	1.10082	0.905303	1.56105	1.11797	0.469044	0.411025	0.250126	0.291853	0.495476	0.775885	0.310872
gene14729	LOC109418415	AALF004898	protein maelstrom homolog (mael)	6.81151	7.62957	9.52714	6.35385	3.06271	8.96577	17.5524	9.95484	12.942	40.6626	46.5194	44.9989	53.9091	53.7083	67.1886	61.8994	29.2829	13.3235	17.2202	13.5784	78.0027	131.563	97.1089	97.3082	46.9915	53.0895	46.743	44.1621	28.742	39.3947	33.7913	32.1261	20.505	55.0086	25.0932	15.5963	12.3961	30.7479	14.8177	14.3074	13.8215	10.3841	8.06101	15.2084	12.8309	5.59372
gene1784	LOC109417593	AALF019672	protein maelstrom homolog (mael)	59.5726	0.164652	0.166	0.216616	0.0460625	0.128749	9.09502	4.84187	0.656019	113.144	92.1553	81.5452	117.429	123.874	126.696	143.254	2.83839	1.47231	3.13136	2.22037	119.881	50.4662	34.5129	7.83286	8.27001	7.25268	4.72616	5.24029	5.32667	6.20325	4.17037	5.18116	3.61431	8.06818	3.47136	4.15599	3.60647	4.42629	3.50593	2.27992	0.60936	0.766892	0.273943	1.69418	0.611578	1.89129
gene16306	LOC109420085	AALF008727	tudor and KH domain-containing protein%2C transcript variant X1	4.63891	37.469	34.7286	14.133	12.1738	28.9262	33.155	25.3102	36.5304	43.6364	37.252	29.4747	23.2844	45.2172	39.646	46.9341	1.36718	7.79221	8.07604	7.94505	46.1703	54.6546	37.9455	7.91621	5.17841	5.83921	4.66104	5.68112	5.31208	2.38394	2.91709	2.90291	1.94553	3.72511	1.96429	3.79376	4.61929	3.24452	4.58064	6.01674	17.0764	13.785	11.9419	6.25043	6.47142	22.7093
gene27800	LOC109432366	AALF016817	RING finger protein 17-like	16.6883	1.19263	1.37969	1.12548	0.843876	1.16596	4.28864	2.60623	2.05073	35.2216	24.0457	32.6848	22.4224	22.2747	37.5575	33.6692	1.43519	2.59025	2.52034	2.51988	30.9122	31.8262	31.1587	7.12331	7.46597	9.04257	8.69951	8.71843	5.90333	4.80207	4.27173	4.72005	3.49043	5.16704	1.9121	1.6692	1.61407	4.08407	1.60349	1.03015	1.27083	2.68149	1.68084	2.16409	1.86477	0.914244
gene14810	LOC109418502	AALF005069	inactive peptidyl-prolyl cis-trans isomerase shutdown-like	17.3873	2.6391	5.45218	3.91117	1.51918	5.1356	9.55519	8.80762	6.01799	35.5361	37.4296	35.7471	37.6285	58.8406	59.7131	65.72	12.0077	10.574	12.7506	10.9941	60.2754	97.2481	94.0929	30.4186	25.8564	30.5142	33.2693	31.0963	28.7787	18.3933	17.5816	18.3532	12.1498	23.8924	11.3974	7.6386	9.089	14.7857	8.43859	10.2315	12.1618	5.76043	7.12874	5.24582	7.86779	2.45298
gene14842	LOC109418548	AALF006846	probable ATP-dependent RNA helicase spindle-E	18.4895	5.37898	8.91374	7.17025	3.33225	5.64338	10.4036	6.38424	8.39416	36.162	23.32	28.8459	20.4574	27.6163	39.8062	32.1566	23.409	11.3702	12.7424	14.1919	40.4969	37.3559	36.6581	68.228	25.4919	33.6484	43.4483	44.218	39.9622	25.8695	29.9647	26.441	20.006	25.9129	17.327	12.5192	11.6395	24.9585	13.3397	5.60097	8.56627	5.61163	7.67336	17.9121	12.8209	4.62811
gene23595	LOC109427899	AALF023641	uncharacterized LOC109427899	8.20019	1.77957	2.70599	1.836	0.85906	3.42572	6.38385	4.1345	3.17115	17.259	18.3432	14.1676	20.9411	44.0775	39.7214	44.2982	2.17015	3.23824	3.83209	3.55116	48.7787	55.4591	50.0041	13.2709	6.93231	8.20421	5.99024	6.21904	5.09801	5.03036	5.13069	5.6456	3.84781	6.53301	3.40479	4.2047	3.91159	4.87167	3.14635	3.05977	3.58879	2.51007	2.47767	2.5713	3.43891	1.8537
gene30607	LOC109427899	AALF023641	maternal protein tudor-like	48.9287	18.853	20.2969	11.2491	6.99672	12.5203	20.9848	11.5822	16.5123	71.0897	45.8422	54.8407	37.43	45.5333	68.3145	55.5524	9.5053	3.33127	5.17324	4.13895	54.9877	14.003	5.71169	4.86234	4.55341	4.02371	4.65127	4.89806	5.19264	4.09947	7.32597	8.93559	10.0439	2.79538	8.31129	8.03369	8.22905	8.72528	7.92272	1.80914	6.00113	6.05384	6.78861	22.6776	12.4466	14.5892
gene17795	LOC109421659	AALF001636	ATP-dependent RNA helicase WM6	61.1603	18.2232	40.6604	30.5126	14.6655	36.6166	55.2612	57.626	44.106	229.697	225.753	207.994	234.503	279.036	269.835	290.339	149.78	57.2119	116.27	60.9444	343.448	275.031	532.301	298.477	236.075	243.003	266.78	278.909	276.284	249.032	252.51	217.251	138.316	198.423	155.944	103.007	89.2775	207.713	85.2504	127.306	92.082	48.4402	53.0317	69.9047	81.0276	17.0083
gene4406	LOC109407249	AALF004254	protein valois-like	16.3755	1.25798	2.57621	2.40925	0.845916	2.82232	3.48272	4.46744	3.07281	22.9867	27.0658	18.1226	24.1136	30.2154	26.2431	34.0358	4.73997	6.45896	6.64258	4.81121	37.0932	56.6818	53.1876	15.679	28.9486	26.0721	21.1635	23.3171	19.8829	18.1037	13.9364	11.4566	8.47577	32.2729	9.76632	7.57853	6.82924	11.2713	7.07325	9.09597	11.8288	3.2657	4.67655	2.99013	3.62251	1.19524
gene24507	LOC109428898	AALF027794	ATP-dependent RNA helicase DDX42	10.9745	4.83098	5.25316	3.48615	2.46892	6.49968	6.59948	6.99925	7.99291	12.2724	10.7312	11.7225	13.1118	9.58312	11.1852	11.0843	4.06001	3.25139	5.45946	2.56925	10.0615	12.7042	16.6424	17.8967	19.2317	19.6248	20.6136	20.3038	14.0174	17.3394	17.0074	15.0265	12.4198	20.6729	8.88549	8.08925	7.67687	12.8093	7.7701	7.28639	6.45507	3.63719	5.32692	8.47202	10.4668	2.83627
gene11649	LOC109415176	--	uncharacterized LOC109415176	11.9016	0.37457	1.61708	0.577136	0.466356	0.945477	1.34698	4.25518	2.12602	37.9592	18.3133	24.5118	15.825	27.3147	45.0741	43.4736	3.51953	9.13651	8.24814	10.774	36.4273	44.9724	50.7272	5.63686	5.80625	7.39007	4.53871	4.55959	3.46622	5.35584	2.69656	2.54549	1.4693	7.66329	1.20927	1.02147	1.0246	2.58485	1.41982	3.49354	2.51514	2.4818	1.49363	0.975787	0.684366	0.350652
gene30030	LOC109397933	AALF028574	mitochondrial cardiolipin hydrolase	25.0265	1.96178	1.81182	2.5097	1.85362	1.28305	6.12116	3.95066	1.53957	25.2415	23.448	22.9292	28.7646	32.7352	39.4324	31.7789	3.67107	4.22507	5.9902	4.45323	42.3837	64.5506	56.8273	13.6931	10.167	11.7665	6.55339	6.7511	5.06677	5.24317	3.12164	4.0818	3.08812	7.43765	2.88942	2.60331	2.13544	3.71742	2.48449	2.26307	3.7317	2.59896	4.60565	3.35459	3.40527	2.63514
gene21416	LOC109425508	AALF015078	uncharacterized LOC109425508	13.8663	0.346629	0.877643	1.09615	0.329485	1.1745	2.64419	1.62823	0.820984	22.5345	18.0672	17.1843	23.5578	24.4338	23.8585	20.4765	1.0472	0.663396	0.904291	0.731836	17.7884	24.4118	24.7053	4.89626	2.23073	2.69702	2.37999	2.72084	2.68503	1.66228	0.909478	0.846013	0.602071	2.90358	0.585058	0.603215	0.618821	0.981358	0.407061	0.774771	0.633774	0.4072	0.845875	0.881559	0.513542	0.574
gene25666	LOC109430043	AALF013981	probable ATP-dependent RNA helicase DDX43	63.0616	3.62793	7.30283	7.35912	2.61332	8.08984	10.4965	9.50731	9.03258	75.157	52.2876	61.0179	48.7451	30.8093	51.3098	47.8913	4.50934	15.2998	12.3142	12.8428	50.7553	23.6972	23.1375	19.081	24.1204	29.0656	16.9292	15.6871	12.1266	12.0185	6.66209	9.67586	4.598	13.7748	4.52622	3.22176	2.50683	8.37191	3.69396	7.15402	8.16181	6.63628	6.46281	11.2412	10.8087	3.6693
gene9336	LOC109412633	AALF003796	uncharacterized LOC109412633	11.969	2.12186	3.90802	2.06604	0.988501	2.55021	7.38974	4.79391	3.55525	46.0331	37.7207	42.06	34.2041	46.4687	63.6342	64.1115	5.04411	3.90085	5.86189	3.77746	94.1377	65.7154	55.1628	17.9568	15.7955	15.5371	15.321	14.8796	16.0188	8.00008	9.21852	9.49157	5.97935	9.05058	6.01961	5.34016	5.93077	8.18574	4.95901	3.68683	4.03996	1.90943	2.79093	3.44725	2.94032	1.56042
[truncated: 1 more columns]
